# Supplementary material for: Effects of Immersive Virtual Reality on Patient Anxiety During Surgery Under Regional Anesthesia: A Randomized Clinical Trial
Source: PubMed Central journal article supplement — Anesth Pain Med. 2023 Mar 4;13(2):e130790. doi: 10.5812/aapm-130790 (PMC10461385; doi:10.5812/aapm-130790), 2023-03-04
Supplement: aapm-13-2-130790-s001.pdf [file aapm-13-2-130790-s001.pdf]

### Appendix 1. Questionnaire STAI-6 English version

A number of statements which people have used to describe themselves are given below. Read each statement and then circle the most appropriate number to the right of the statement to indicate how you feel right now, at this moment. There are no right or wrong answers. Do not spend too much time on any one statement but give the answer which seems to describe your present feelings best.

|                  | None | Somewhat | Moderately | Very Much |
|------------------|------|----------|------------|-----------|
| 1 I feel calm    | 1    | 2        | 3          | 4         |
| 2 I am tense     | 1    | 2        | 3          | 4         |
| 3 I feel upset   | 1    | 2        | 3          | 4         |
| 4 I am relaxed   | 1    | 2        | 3          | 4         |
| 5 I feel content | 1    | 2        | 3          | 4         |
| 6 I am worried   | 1    | 2        | 3          | 4         |

Please make sure that you have answered all the questions

### Appendix 2. Questionnaire STAI-6 Indonesian version

#### Lampiran 1. Kuesioner STAI-6 versi indonesia

Dibawah ini terdapat beberapa pernyataan yang menggambarkan perasaan pasien. Pahami setiap pernyataan, dan pilih angka yang paling sesuai dengan perasaan anda saat ini. Tidak ada jawaban yang benar maupun salah, berikan jawaban yang paling mendeskripsikan perasaan anda saat ini

|                                              | Tidak sama sekali | Sedikit | Cukup | Sangat |
|----------------------------------------------|-------------------|---------|-------|--------|
| 1. Saya merasa tenang                        | 1                 | 2       | 3     | 4      |
| 2. Saya merasa tegang                        | 1                 | 2       | 3     | 4      |
| 3. Saya merasa kesal                         | 1                 | 2       | 3     | 4      |
| 4. Saya merasa santai                        | 1                 | 2       | 3     | 4      |
| 5. Saya merasa cukup dengan kondisi saat ini | 1                 | 2       | 3     | 4      |
| 6. Saya merasa khawatir                      | 1                 | 2       | 3     | 4      |

Pastikan bahwa pasien telah menjawab semua pernyataan
